# Supplementary material
Source: Springer Nature journal article supplement (https://www.springermedizin.de/resource/supplementary/13063_2013_1939_MOESM1_ESM.pdf/9621950)
Supplement: MOESM1 [file 9621950]

Specialist Delirium  
Practitioner

Stop  
Delirium! box

Stop  
Delirium!  
Manual

Education  
sessions x3

Delirium  
Champion in  
care home

Working  
groups
